# Supplementary material for: Parametric Mapping for TSPO PET Imaging with Spectral Analysis Impulsive Response Function
Source: PubMed Central journal article supplement (PMC8277653; doi:10.1007/s11307-020-01575-9), 2021-01-21
Supplement: 11307_2020_1575_MOESM1_ESM.pdf [file 11307_2020_1575_MOESM1_ESM.pdf]

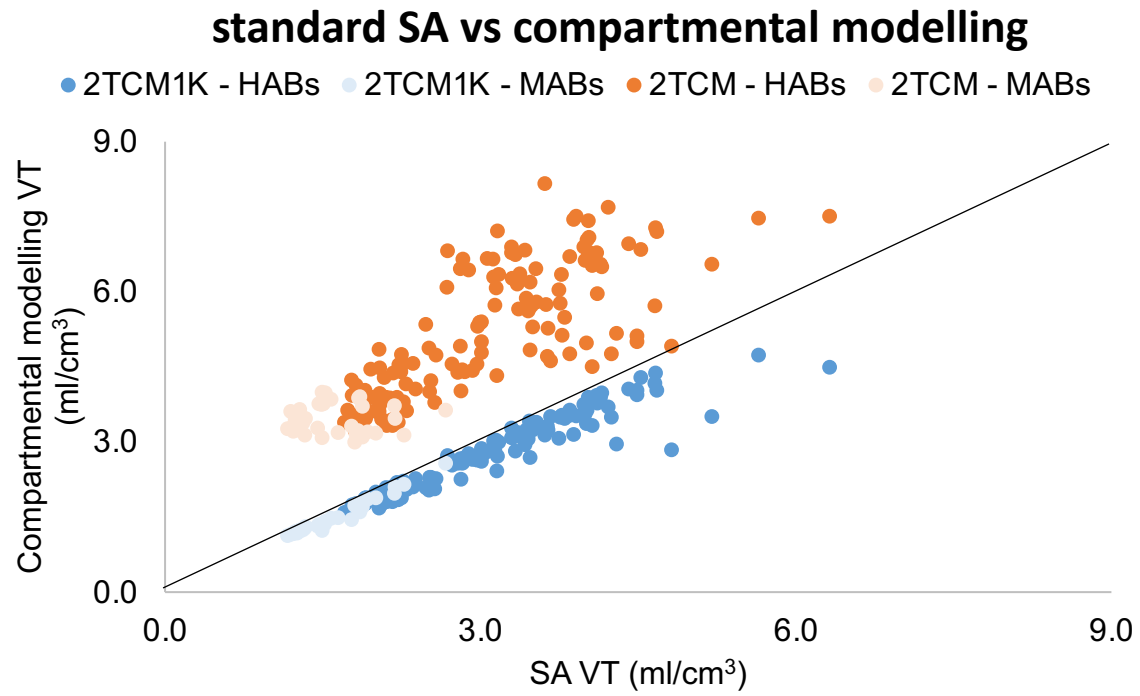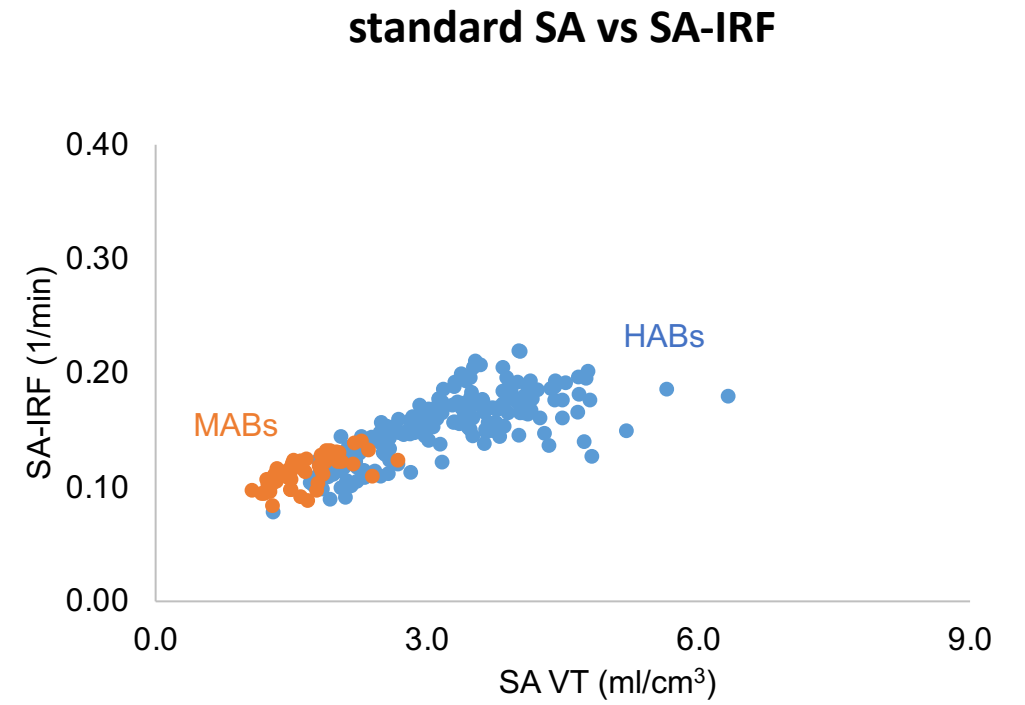

### A) Kinetic Spectrum

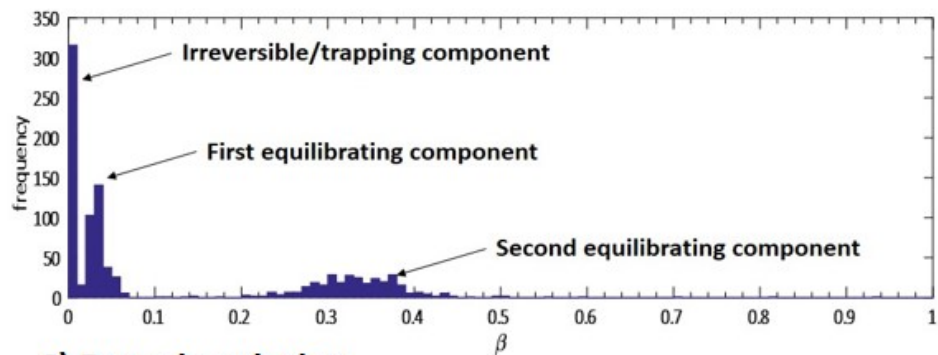

### C) Data description

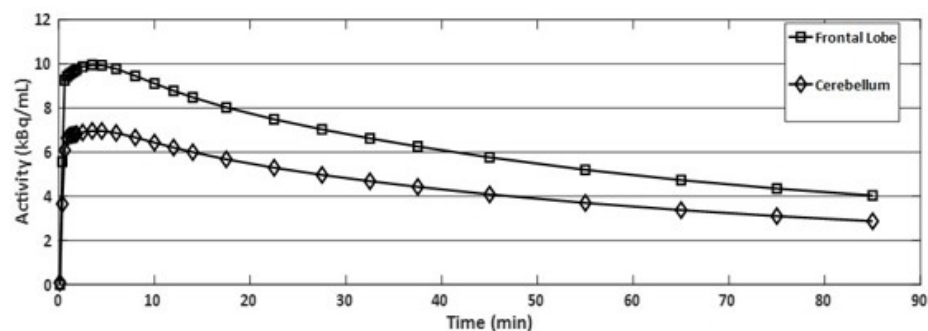

### B) Statistics of irreversible components estimated with SA

*HABs*

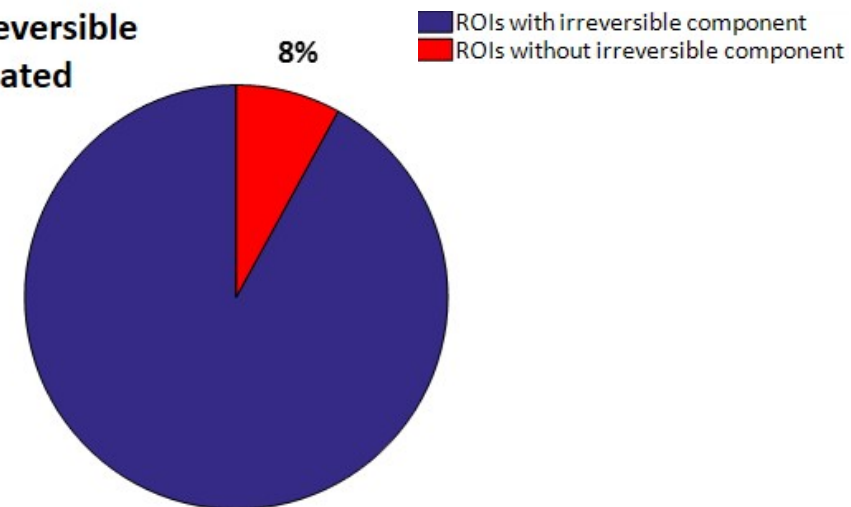

*MABs*

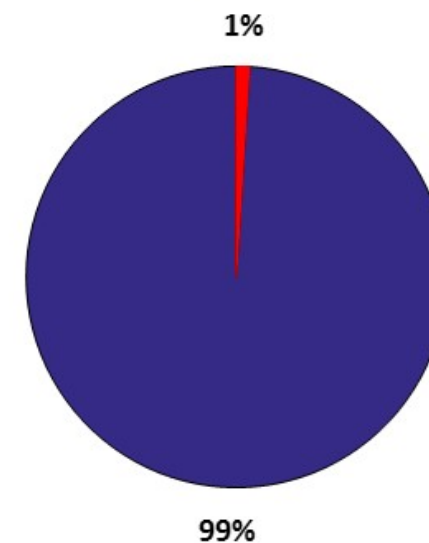

# Parametric mapping for TSPO PET imaging with spectral analysis impulsive response function

Paired t-test to compare [11C]PRB28 PET SA IRF voxel estimates before and after competitive TSPO blockage with XBD173

Hypothesis: SA IRF baseline > SA IRF blocking

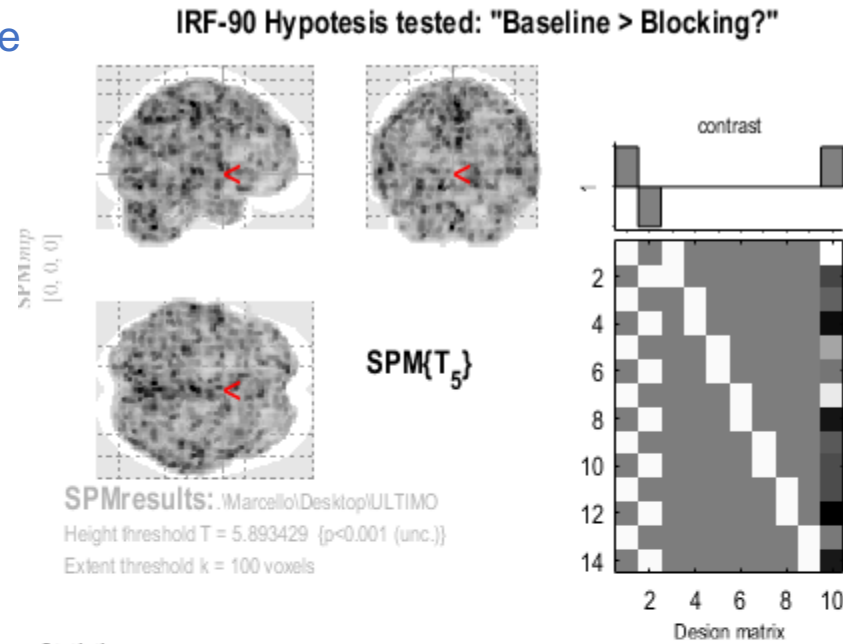

**Statistics: p-values adjusted for search volume**

| cluster-level  |                |        |              | peak-level     |                |       |             |              | mm mm mm |     |     |
|----------------|----------------|--------|--------------|----------------|----------------|-------|-------------|--------------|----------|-----|-----|
| $p_{FWE-corr}$ | $q_{FDR-corr}$ | $k_E$  | $p_{uncorr}$ | $p_{FWE-corr}$ | $q_{FDR-corr}$ | T     | $(Z_{...})$ | $p_{uncorr}$ |          |     |     |
| 0.000          | 0.000          | 969120 | 0.000        | 0.017          | 0.217          | 47.26 | 5.37        | 0.000        | 2        | -24 | 50  |
|                |                |        |              | 0.018          | 0.217          | 46.83 | 5.36        | 0.000        | -2       | -56 | -42 |
|                |                |        |              | 0.018          | 0.217          | 46.39 | 5.35        | 0.000        | -12      | -68 | -12 |

table shows 3 local maxima more than 8.0mm apart

|                                                                      |                                                           |
|----------------------------------------------------------------------|-----------------------------------------------------------|
| Height threshold: T = 5.89, p = 0.001 (1.000)                        | Degrees of freedom = (1.0, 5.0)                           |
| Extent threshold: k = 100 voxels, p = 0.005 (0.180)                  | FWHM = 16.4 16.7 15.5 mm mm mm; 8.2 8.4 7.7 (voxels)      |
| Expected voxels per cluster, <math>\langle k \rangle = 10.680</math> | Volume: 3345448 = 418181 voxels = 747.4 resels            |
| Expected number of clusters, <math>\langle c \rangle = 0.20</math>   | Voxel size: 2.0 2.0 2.0 mm mm mm; (resel = 529.80 voxels) |
| FWEp: 37.957, FDRp: Inf, FWEc: 96912, FDRc: 96912                    |                                                           |

# Parametric mapping for TSPO PET imaging with spectral analysis impulsive response function

Paired t-test to compare [11C]PRB28 PET SA number of spectral components before and after competitive TSPO blockage with XBD173

Hypothesis: no difference between two conditions

Supplementary Figure 4

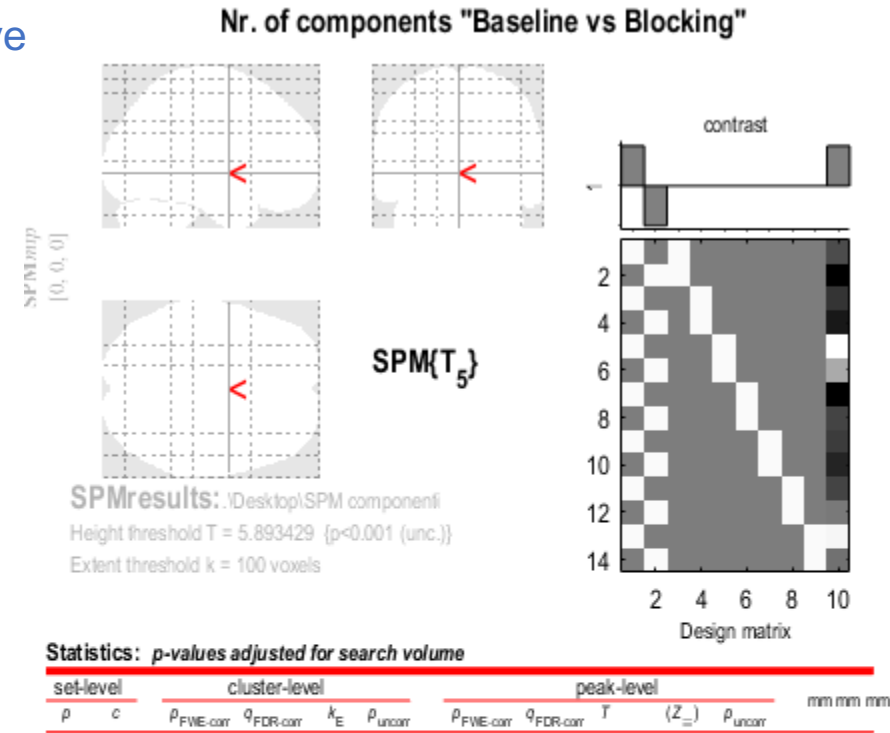

*no suprathreshold clusters*

*table shows 3 local maxima more than 8.0mm apart*

|                                                                     |                                                          |
|---------------------------------------------------------------------|----------------------------------------------------------|
| Height threshold: T = 5.89, p = 0.001 (1.000)                       | Degrees of freedom = (1.0, 5.0)                          |
| Extent threshold: k = 100 voxels, p = 0.000 (0.000)                 | FWHM = 4.3 4.4 4.6 mm mm mm; 2.1 2.2 2.3 {voxels}        |
| Expected voxels per cluster, <math>\langle k \rangle = 0.217</math> | Volume: 1535640 = 191955 voxels = 15722.3 reals          |
| Expected number of clusters, <math>\langle c \rangle = 0.00</math>  | Voxel size: 2.0 2.0 2.0 mm mm mm; (resel = 10.78 voxels) |
| FWEp: 32.465, FDRp: Inf, FWEc: 8, FDRc: 1                           |                                                          |

# Parametric mapping for TSPO PET imaging with spectral analysis impulsive response function

Paired t-test to compare [11C]PRB28 PET blood volume before and after competitive TSPO blockage with XBD173

Hypothesis: no difference between two conditions

Supplementary Figure 5

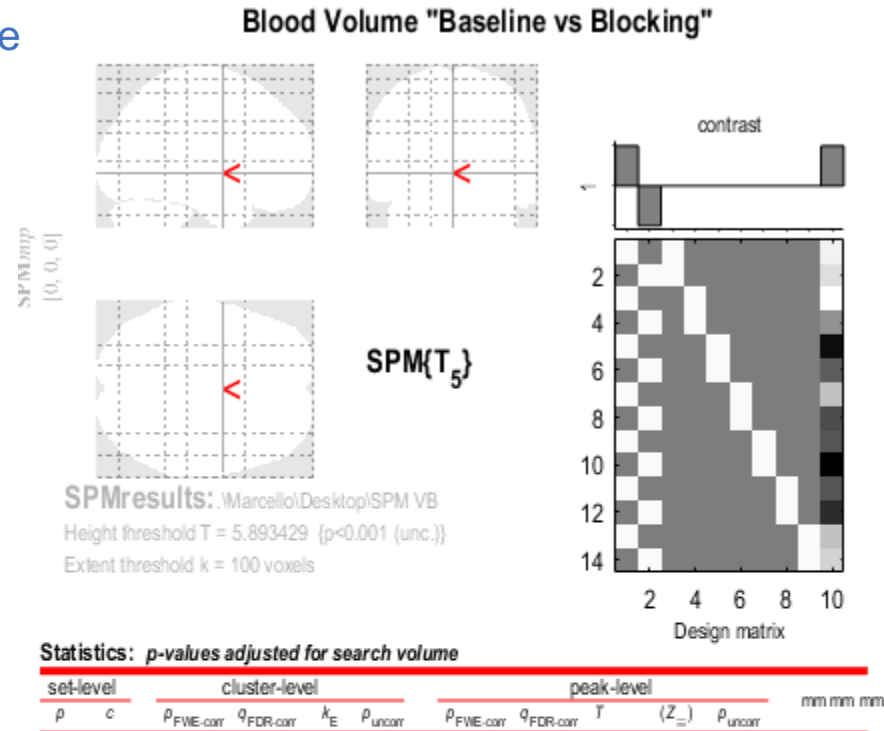

*no suprathreshold clusters*

*table shows 3 local maxima more than 8.0mm apart*

|                                                                     |                                                          |
|---------------------------------------------------------------------|----------------------------------------------------------|
| Height threshold: T = 5.89, p = 0.001 (1.000)                       | Degrees of freedom = (1.0, 5.0)                          |
| Extent threshold: k = 100 voxels, p = 0.000 (0.000)                 | FWHM = 5.4 5.7 5.8 mm mm mm; 2.7 2.9 2.9 (voxels)        |
| Expected voxels per cluster, <math>\langle k \rangle = 0.449</math> | Volume: 266200 = 33275 voxels = 43.2 resels              |
| Expected number of clusters, <math>\langle c \rangle = 0.00</math>  | Voxel size: 2.0 2.0 2.0 mm mm mm; (resel = 22.26 voxels) |
| FWEp: 22.819, FDRp: Inf, FWEc: Inf, FDRc: Inf                       |                                                          |
